# Supplementary material for: The magnetic roots of enhanced coronal heating in large loops and plumes
Source: MDPI journal article supplement (doi:10.3390/jcm12072471), 1998-01-01
Supplement: s1 [file s1]

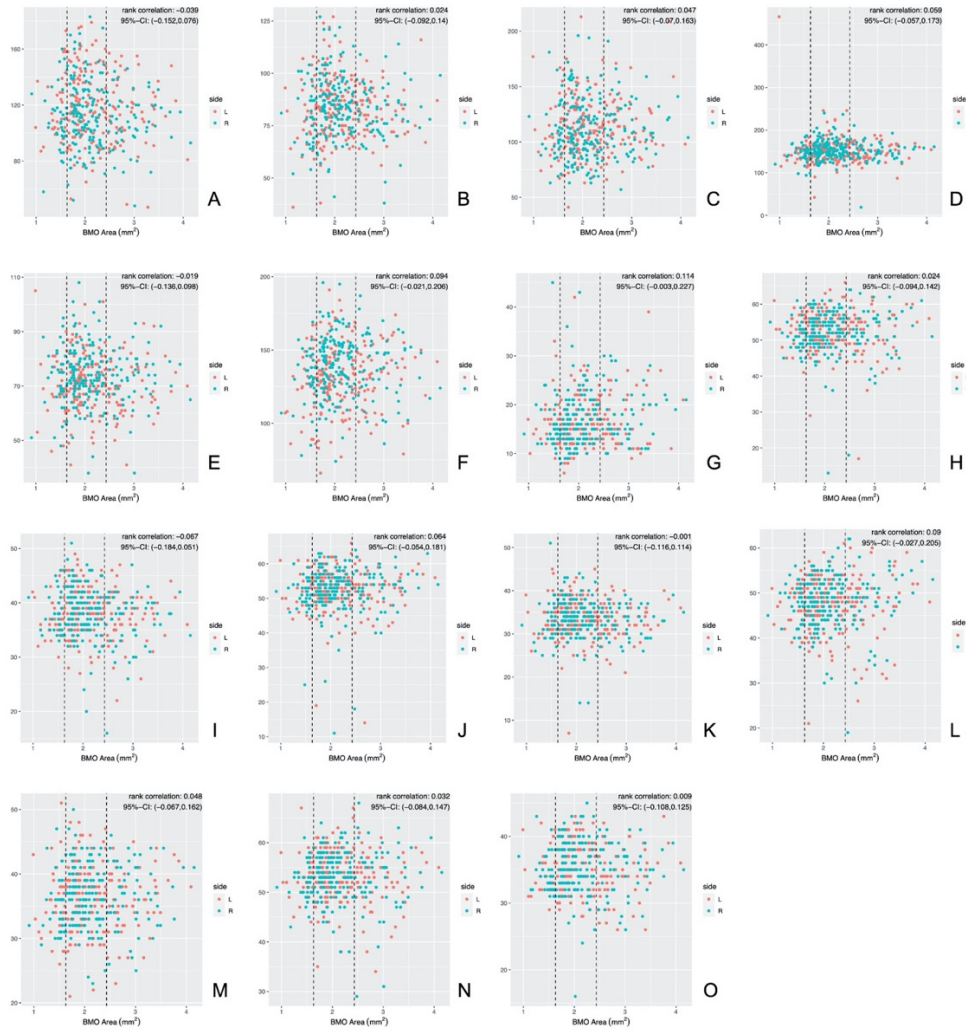

**Figure S1.** Scatter plots of RNFL sectors in relation to BMOA. Dashed lines show bounds grouping by HRT definition.

L = left eye; R = right eye; A = nasal superior (NS); B = nasal (N); C = nasal inferior (NI); D = temporal inferior (TI); E = temporal (T); F = temporal superior (TS); G = Central area (C); H = Inner nasal (IN); I = Outer nasal (ON); J = Inner inferior (II); K = Outer inferior (OI); L = Inner temporal (IT); M = Outer temporal (OT); N = Inner superior (IS); O = Outer superior (OS).
