# Supplementary material for: The magnetic roots of enhanced coronal heating in large loops and plumes
Source: MDPI journal article supplement (doi:10.3390/jcm12072471), 1998-01-01
Supplement: s1 [file s1]

**Table S2.** Differences in individual RNFL and mGCLT sectors between optic disc cohorts based on quantile division. p values  $\leq .05$  are highlighted in bold. Median thickness values for the respective groups are given in  $\mu\text{m}$ .

|              | <i>Small vs<br/>medium</i> | <i>Medium vs<br/>large</i> | <i>Small vs<br/>large</i> | <i>median<br/>thickness<br/>small</i> | <i>median<br/>thickness<br/>medium</i> | <i>median<br/>thickness<br/>large</i> |
|--------------|----------------------------|----------------------------|---------------------------|---------------------------------------|----------------------------------------|---------------------------------------|
| <i>RNFL</i>  |                            |                            |                           |                                       |                                        |                                       |
| NS           | 0.61                       | 1.00                       | 0.76                      | 104.00                                | 113.00                                 | 117.50                                |
| N            | 1.00                       | 1.00                       | 1.00                      | 81.00                                 | 83.00                                  | 80.50                                 |
| NI           | 0.58                       | 1.00                       | 0.47                      | 103.00                                | 109.00                                 | 114.00                                |
| TI           | 0.45                       | 1.00                       | 0.44                      | 145.00                                | 151.00                                 | 158.50                                |
| T            | 1.00                       | 1.00                       | 1.00                      | 73.00                                 | 72.00                                  | 69.00                                 |
| TS           | <b>0.04</b>                | 1.00                       | 0.66                      | 124.00                                | 136.00                                 | 140.00                                |
| <i>mGCLT</i> |                            |                            |                           |                                       |                                        |                                       |
| C            | 1.00                       | 0.10                       | 0.33                      | 15.00                                 | 15.00                                  | 20.00                                 |
| IN           | 1.00                       | 1.00                       | 1.00                      | 53.00                                 | 53.00                                  | 54.50                                 |
| ON           | 1.00                       | 1.00                       | 1.00                      | 37.00                                 | 38.00                                  | 38.50                                 |
| II           | 0.38                       | 0.20                       | 0.11                      | 51.00                                 | 53.00                                  | 55.00                                 |
| OI           | <b>0.03</b>                | 1.00                       | 0.18                      | 31.00                                 | 34.00                                  | 34.00                                 |
| IT           | 1.00                       | <b>0.01</b>                | 0.07                      | 49.00                                 | 48.00                                  | 52.00                                 |
| OT           | 1.00                       | 0.25                       | 0.37                      | 36.00                                 | 37.00                                  | 38.50                                 |
| IS           | 0.83                       | 1.00                       | 0.82                      | 52.00                                 | 53.00                                  | 54.00                                 |
| OS           | 1.00                       | 1.00                       | 1.00                      | 35.00                                 | 35.00                                  | 35.50                                 |

RNFL sectors: NS = nasal superior; N = nasal; NI = nasal inferior; TI = temporal inferior; T = temporal; TS = temporal superior; mGCLT sectors: C = Central area; IN = Inner nasal; ON = Outer nasal; II = Inner inferior; OI = Outer inferior; IT = Inner temporal; OT = Outer temporal; IS = Inner superior; OS = Outer superior.
