# Supplementary material for: The magnetic roots of enhanced coronal heating in large loops and plumes
Source: MDPI journal article supplement (doi:10.3390/jcm12072471), 1998-01-01
Supplement: s1 [file s1]

**Table S1.** Differences in individual RNFL and mGCLT sectors between optic disc cohorts based on HRT division. Variable-wise Bonferoni-corrected p values  $\leq .05$  are highlighted in bold. Median thickness values for groups 1, 2, 3 are given in  $\mu\text{m}$ .

|              | <i>Small vs<br/>medium</i> | <i>Medium<br/>vs large</i> | <i>Small vs<br/>large</i> | <i>median<br/>thickness<br/>small</i> | <i>median<br/>thickness<br/>medium</i> | <i>median<br/>thickness<br/>large</i> |
|--------------|----------------------------|----------------------------|---------------------------|---------------------------------------|----------------------------------------|---------------------------------------|
| <i>RNFL</i>  |                            |                            |                           |                                       |                                        |                                       |
| NS           | 0.62                       | 0.30                       | 1.00                      | 108.00                                | 115.00                                 | 112.00                                |
| N            | 0.11                       | <b>0.05</b>                | 1.00                      | 80.50                                 | 85.00                                  | 82.00                                 |
| NI           | 0.42                       | 1.00                       | 0.43                      | 103.50                                | 109.00                                 | 112.00                                |
| TI           | <b>0.03</b>                | 0.63                       | 0.48                      | 147.00                                | 153.00                                 | 151.00                                |
| T            | 0.75                       | 0.39                       | 1.00                      | 69.50                                 | 72.00                                  | 71.00                                 |
| TS           | 0.06                       | 1.00                       | 0.22                      | 130.50                                | 137.00                                 | 138.00                                |
| <i>mGCLT</i> |                            |                            |                           |                                       |                                        |                                       |
| C            | 1.00                       | 0.63                       | 0.67                      | 15.00                                 | 16.00                                  | 16.00                                 |
| IN           | 0.46                       | 1.00                       | 1.00                      | 52.50                                 | 53.00                                  | 53.00                                 |
| ON           | 0.06                       | 0.04                       | 1.00                      | 37.00                                 | 39.00                                  | 38.00                                 |
| II           | <b>0.04</b>                | 1.00                       | 0.42                      | 52.00                                 | 54.00                                  | 54.00                                 |
| OI           | <b>0.04</b>                | 0.09                       | 1.00                      | 32.00                                 | 34.00                                  | 33.00                                 |
| IT           | 1.00                       | 1.00                       | 1.00                      | 48.50                                 | 48.00                                  | 49.00                                 |
| OT           | 0.05                       | 1.00                       | 0.36                      | 36.00                                 | 37.00                                  | 37.00                                 |
| IS           | <b>0.02</b>                | 0.35                       | 1.00                      | 52.00                                 | 54.00                                  | 53.00                                 |
| OS           | <b>0.01</b>                | 0.17                       | 0.80                      | 34.00                                 | 35.50                                  | 35.00                                 |

RNFL sectors: NS = nasal superior; N = nasal; NI = nasal inferior; TI = temporal inferior; T = temporal; TS = temporal superior; mGCLT sectors: C = Central area; IN = Inner nasal; ON = Outer nasal; II = Inner inferior; OI = Outer inferior; IT = Inner temporal; OT = Outer temporal; IS = Inner superior; OS = Outer superior.
